# Supplementary material
Source: PubMed Central journal article supplement (PMC3365357)
Supplement: Supp_Data.pdf [file Supp_Data.pdf]

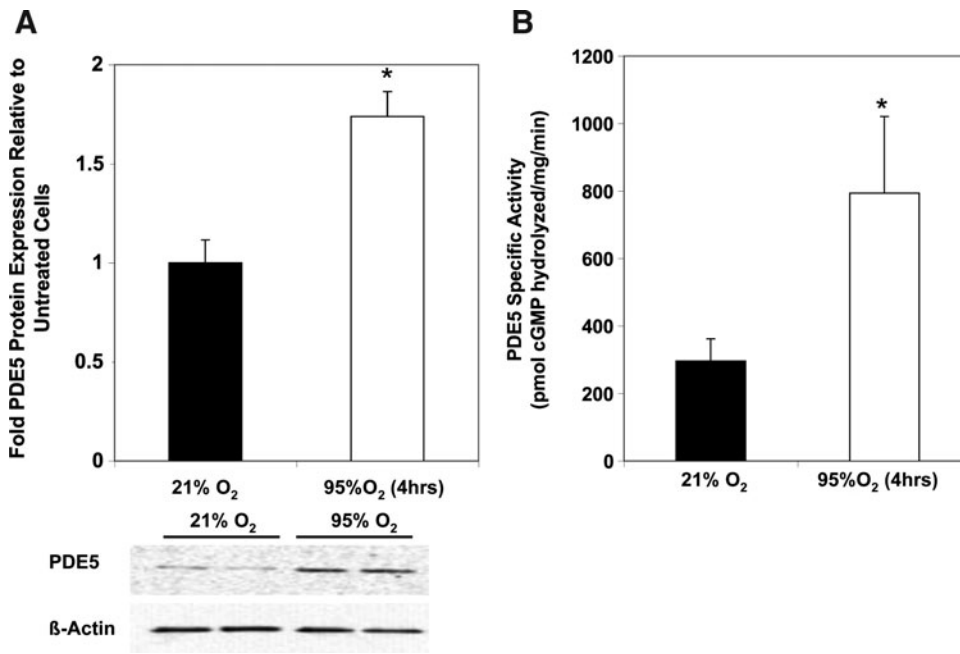

**SUPPLEMENTARY FIG. S2. Four hours of 95% O<sub>2</sub>/5% CO<sub>2</sub> increases PDE5 protein expression and activity.** Protein was harvested from FPASCMS exposed to either 21% O<sub>2</sub>/5% CO<sub>2</sub> or 95% O<sub>2</sub>/5% CO<sub>2</sub> for 4h. **(A)** PDE5 protein expression analyzed by Western blot, normalized for β-actin (*n*=12). Data are shown as mean±SEM relative to FPASCMS in 21% O<sub>2</sub>/5% CO<sub>2</sub>. A representative Western blot is shown for PDE5 and β-actin. **(B)** PDE5-specific cGMP hydrolytic activity was measured using a commercially available colorimetric assay (*n*=10, read in duplicate). Data are shown as mean±SEM pmol cGMP hydrolyzed/mg protein/min. \**p*<0.05 vs. FPASCMS in 21% O<sub>2</sub>/5% CO<sub>2</sub>.

*Hyperoxia exposure of mice and isolation of lungs and small PA*

The study was approved by the Northwestern University Laboratory Animal Care Committee. Male C57Bl6 mice (Charles River, age 5–6 weeks) were placed into three experimental groups: 1) room air, nonventilated (21NV, *n*=5), 2) mechanically ventilated with 100% O<sub>2</sub> for 45 min (100V, *n*=5), and 3) 90% O<sub>2</sub> exposure for 45 min in an animal hyperoxia chamber (Biospherix; 90NV, *n*=5). Mice were ventilated with the TOPO Dual Mode Ventilator as per manufacturer instructions with peak inspiratory pressure 15 cm H<sub>2</sub>O, PEEP 4 cm H<sub>2</sub>O, and respiratory rate 140 breaths per minute (Kent Scientific, Torrington, CT). During ventilation, mice were anesthetized with Avertin. After exposure, animals were euthanized by isoflurane overdose followed by cervical dislocation. Lungs were perfused with PBS via the RV and PA. Lung tissue was harvested and flash-frozen for subsequent cGMP analysis. For PDE5 activity assays, small PA protein was isolated using a variation of the previously described rodent PASCMS isolation technique (7). Briefly, a solution of 0.5% (w/v) agarose + 0.5% iron particles (0.2 μM) in M199 (Mediatech) was infused into the pulmonary vasculature. The iron particles are excluded from the pulmonary capillary bed and lodge in small PA. The lungs were inflated with 1% (w/v) agarose, removed, and chilled; lung tissue was dissociated in cold PBS. A Dynal Magnetic Particle was used to pull down the iron-containing vessels. After collagenase (80U/mL) treatment and manual dissociation, the vessels were lysed and sonicated in 1×Mg-lysis buffer (Upstate, Charlottesville, VA) supplemented with a protease inhibitor cocktail (Sigma, St. Louis, MO) and a

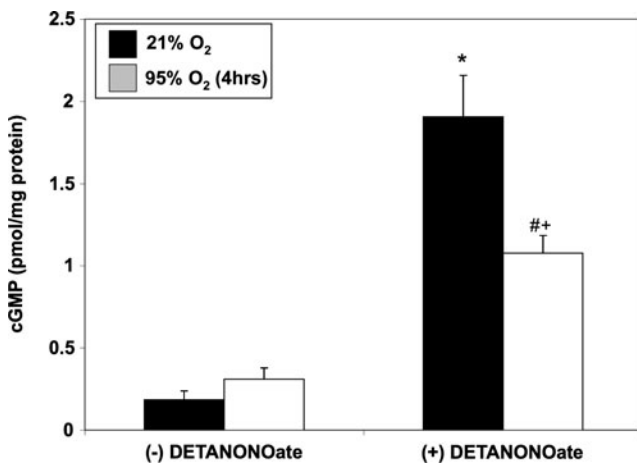

**SUPPLEMENTARY FIG. S3. Four hours of 95% O<sub>2</sub>/5% CO<sub>2</sub> blunts cGMP responsiveness to exogenous NO.** FPASCMS were exposed to 21% O<sub>2</sub>/5% CO<sub>2</sub> or 95% O<sub>2</sub>/5% CO<sub>2</sub>±DETANONOate (100 μM) for 4h. Cells were harvested and assayed for cGMP by EIA. cGMP levels were normalized for milligrams of total protein. Data are shown as mean±SEM (*n*=10, read in duplicate). \**p*<0.05 vs. untreated FPASCMS in 21% O<sub>2</sub>/5% CO<sub>2</sub>; #*p*<0.05 vs. untreated FPASCMS in 95% O<sub>2</sub>/5% CO<sub>2</sub>; +*p*<0.05 vs. NO-treated PASCMS in 21% O<sub>2</sub>/5% CO<sub>2</sub>.

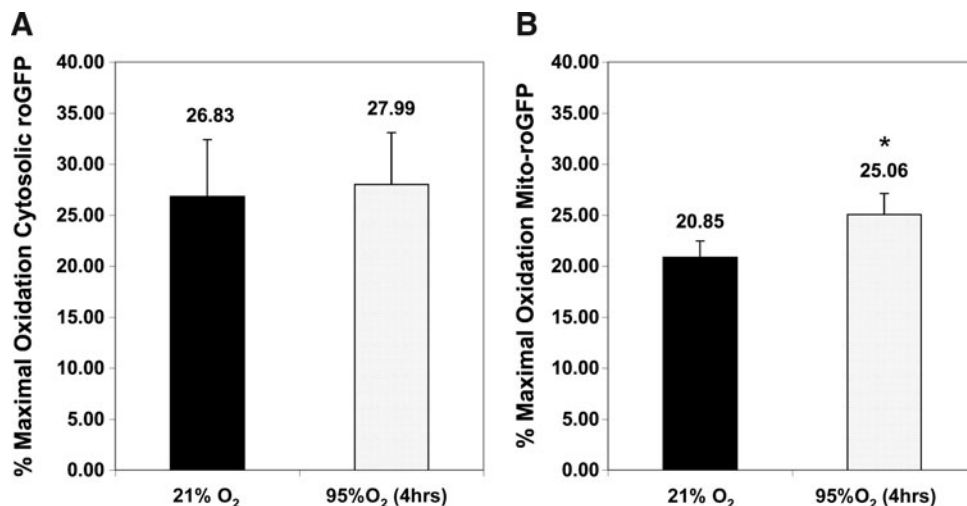

**SUPPLEMENTARY FIG. S4. Four hours of 95% O<sub>2</sub>/5% CO<sub>2</sub> induces mitochondrial, but not cytosolic, oxidation in FPASMC.** Cytosolic roGFP and mito-roGFP contain surface-exposed cysteine residues that are sensitive to the local redox environment. After measuring the cellular environment using multilaser flow cytometry, the sensor is calibrated by maximally reducing it with dithiothreitol (DTT, 1 mM) and maximally oxidizing it with t-butyl hydroperoxide (TBH, 1 mM) to yield percent oxidation. FPASMC were exposed to 21% O<sub>2</sub>/5% CO<sub>2</sub> or 95% O<sub>2</sub>/5% CO<sub>2</sub> for 4 h, and (A) oxidation of cytosolic roGFP (Panel A, *n*=18) and (B) mito-roGFP (Panel B, *n*=14) was measured (*n*=4). Data are shown as mean ± SEM for the percent maximal oxidation of the cytosolic roGFP and mito-roGFP probes. \**p*<0.05 vs. FPASMC in 21% O<sub>2</sub>/5% CO<sub>2</sub>.

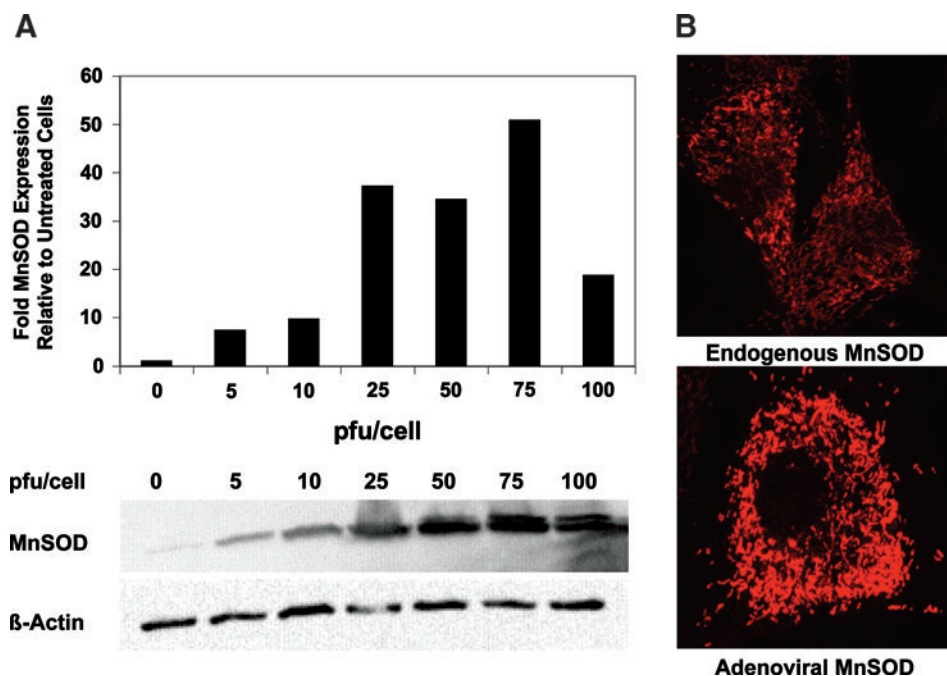

**SUPPLEMENTARY FIG. S5. Dose-response curve for MnSOD overexpression in FPASMC.** FPASMC were infected with varying doses of an adenoviral construct for MnSOD overexpression (0–100 pfu/cell). (A) Protein was harvested 48 h after viral infection and subjected to Western blot analysis, with β-actin normalization. Normalized expression data are shown for the representative Western blots shown for MnSOD and β-actin. (B) FPASMC were plated onto collagen-coated coverslips and infected with 100 pfu/cell MnSOD. After 48 h, FPASMC were fixed, permeabilized, and immunostained for MnSOD. Coverslips were imaged on a Zeiss UV LSM 510 META laser scanning confocal microscope with a 40× oil immersion lens. The top panel shows the endogenous MnSOD expression. The bottom panel shows the MnSOD expression after infection with 100 pfu/cell adenoviral MnSOD.

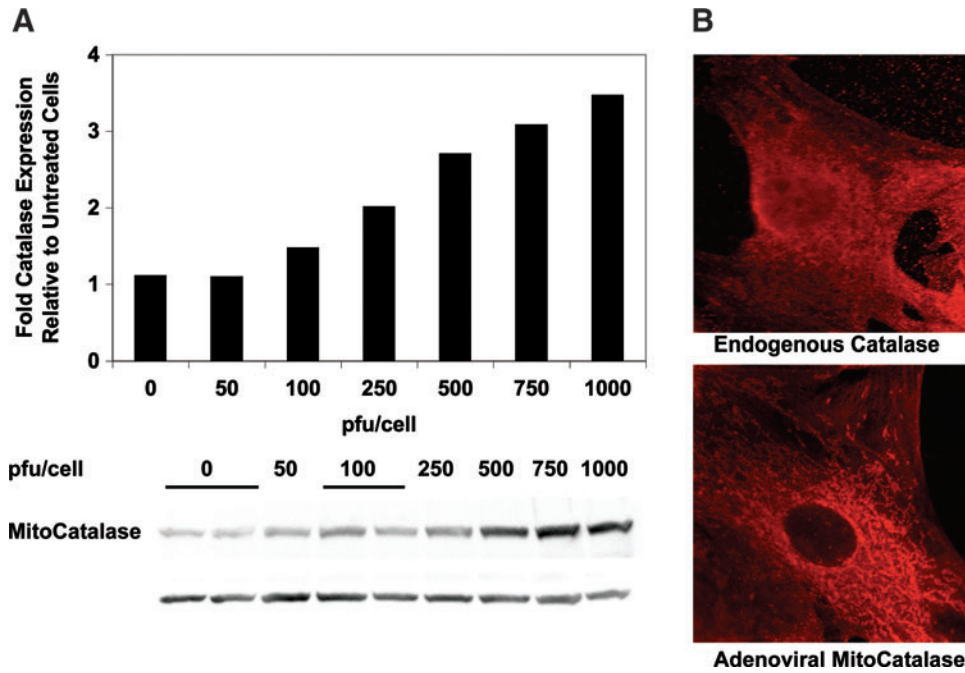

**SUPPLEMENTARY FIG. S6. Dose–response curve for mito-catalase overexpression in FPASMC.** FPASMC were infected with varying doses of an adenoviral construct for mito-catalase overexpression (0–1000 pfu/cell). (A) Protein was harvested 48 h after viral infection and subjected to Western blot analysis, with  $\beta$ -actin normalization. Normalized expression data are shown for the representative Western blots shown for catalase and  $\beta$ -actin. (B) FPASMC were plated onto collagen-coated coverslips and infected with 750 pfu/cell mito-catalase. After 48 h, FPASMC were fixed, permeabilized, and immunostained for catalase. Coverslips were imaged on a Zeiss UV LSM 510 META laser scanning confocal microscope with a 40 $\times$  oil immersion lens. The top panel shows the endogenous catalase expression. The bottom panel shows the catalase expression after infection with 750 pfu/cell adenoviral mito-catalase.

phosphatase inhibitor cocktail (EMD Biosciences, San Diego, CA) as previously described (3), and the iron particles were removed prior to analysis of protein samples (3).

#### Western blot analysis

FPASMC were harvested using 1 $\times$ Mg-lysis buffer (Upstate) supplemented with a protease inhibitor cocktail (Sigma)

and a phosphatase inhibitor cocktail (EMD Biosciences) as previously described (2). Cell extracts were sonicated, and protein concentration was determined using the Bradford assay (1). Total protein (40  $\mu$ g) was separated on a 4%–20% SDS-polyacrylamide gel (Biorad) and then transferred to a nitrocellulose membrane (Amersham, Arlington Heights, IL). Western blot was then performed as previously described (2). Briefly, membranes were blocked at room temperature with

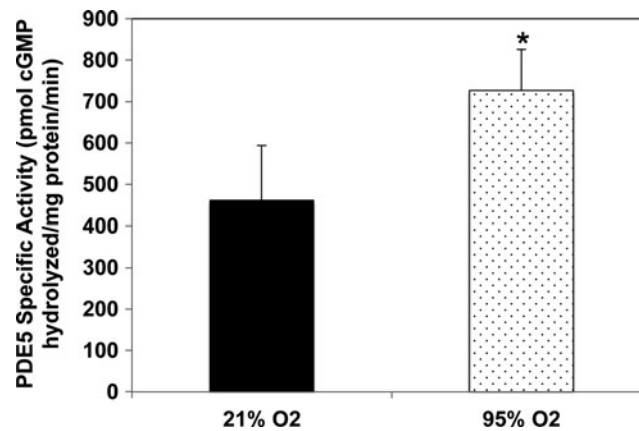

**SUPPLEMENTARY FIG. S7. Thirty minutes of 95% O<sub>2</sub>/5% CO<sub>2</sub> increases PDE5 activity in adult mouse PASM.** Protein was harvested from adult mouse PASM exposed to either 21% O<sub>2</sub>/5% CO<sub>2</sub> or 95% O<sub>2</sub>/5% CO<sub>2</sub> for 30 min, followed by recovery for 30min in 21% O<sub>2</sub>/5% CO<sub>2</sub>. PDE5-specific cGMP hydrolytic activity was measured using a commercially available colorimetric assay ( $n=6$ , read in duplicate). Data are shown as mean  $\pm$  SEM pmol cGMP hydrolyzed/mg protein/min.  $*p=0.05$  vs. PASM in 21% O<sub>2</sub>/5% CO<sub>2</sub>.





- redox potential with redox-sensitive green fluorescent protein indicators. *J Biol Chem* 279: 13044–13053, 2004.
6. Marshall C, Marmay AJ, Verhoeven AJ, and Marshall BE. Pulmonary artery NADPH-oxidase is activated in hypoxic pulmonary vasoconstriction. *Am J Respir Cell Mol Biol* 15: 633–644, 1996.
  7. Waypa GB, Chandel NS, and Schumacker PT. Model for hypoxic pulmonary vasoconstriction involving mitochondrial oxygen sensing. *Circ Res* 88: 1259–1266, 2001.
  8. Waypa GB, Marks JD, Guzy R, Mungai PT, Schriewer J, Dokic D, and Schumacker PT. Hypoxia triggers subcellular compartmental redox signaling in vascular smooth muscle cells. *Circ Res* 106: 526–535, 2010.
  9. Weinberg F, Hamanaka R, Wheaton WW, Weinberg S, Joseph J, Lopez M, Kalyanaraman B, Mutlu GM, Budinger GR, and Chandel NS. Mitochondrial metabolism and ROS generation are essential for Kras-mediated tumorigenicity. *Proc Natl Acad Sci USA* 107: 8788–8793, 2010.
